# Supplementary material for: Design, Synthesis, and Structure–Activity Relationship Studies of New Quinone Derivatives as Antibacterial Agents
Source: MDPI journal article supplement (doi:10.3390/antibiotics12061065), 2023-06-16

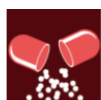

Supplementary materials

---

**Design, synthesis, and structure-activity relationship studies of new quinone derivatives as antibacterial agents**

Juan Andrades-Lagos <sup>1,2†</sup>, Javier Campanini-Salinas <sup>2,3†</sup>, América Pedreros-Riquelme <sup>2</sup>, Jaime Mella <sup>4,5</sup>, Duane Choquesillo-Lazarte <sup>6</sup>, P.P. Zamora <sup>7</sup>, Hernán Pessoa-Mahana <sup>8</sup>; Ian Burbulis <sup>9</sup> and David Vásquez-Velásquez <sup>2,\*</sup>

---

1 Table  
11 Figures  
26 Pages

---



GENERAL SYNTHESIS PROCEDURES PRESENT IN FIGURE 3, INDIVIDUALIZED.

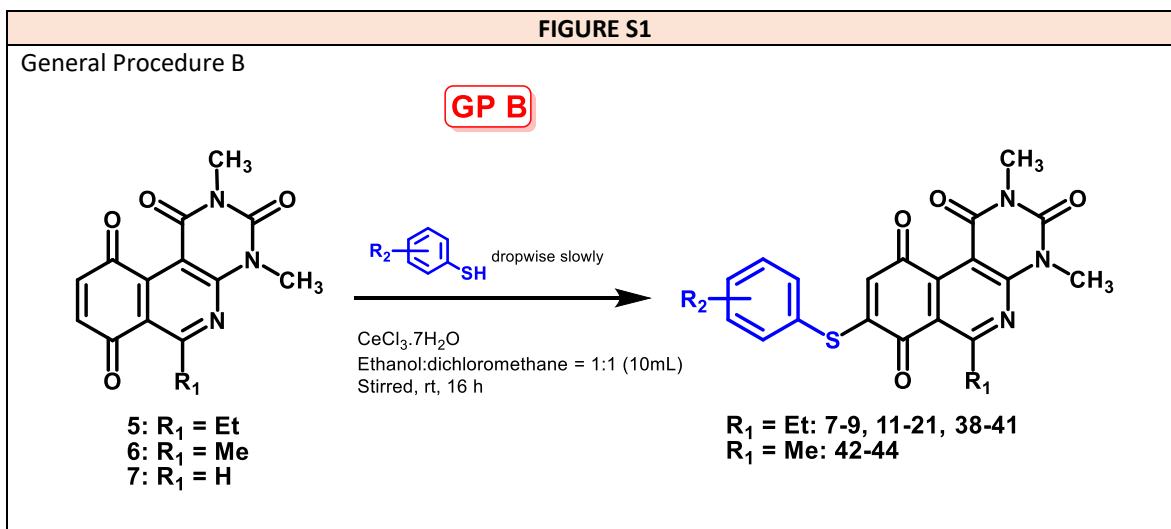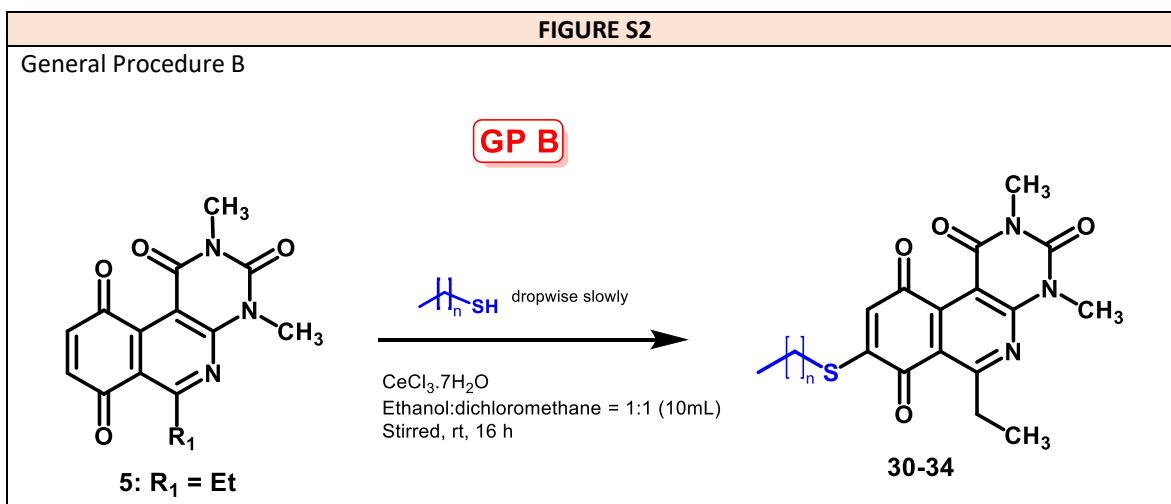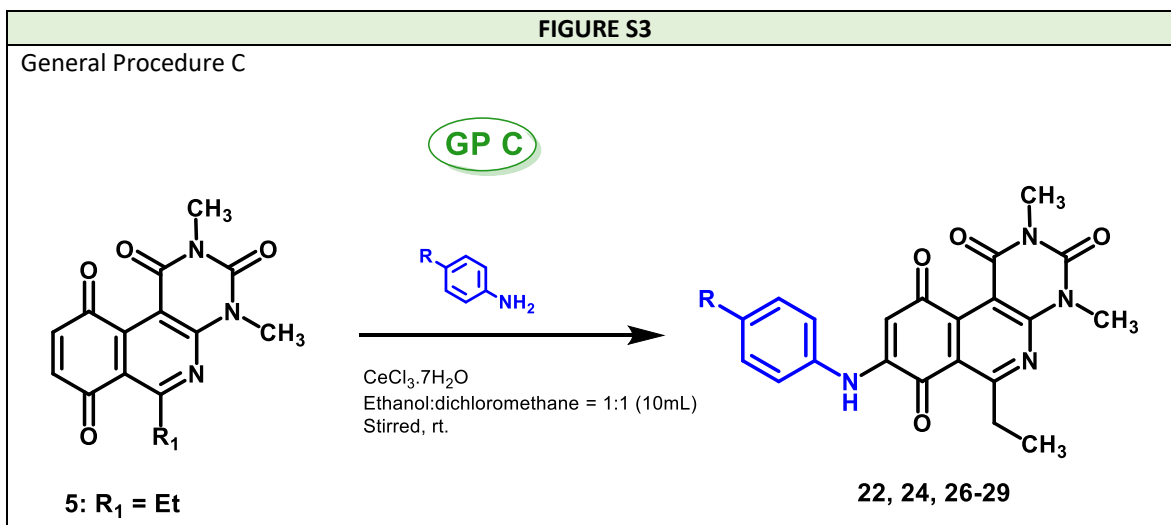



FIGURE S4

General Procedure D

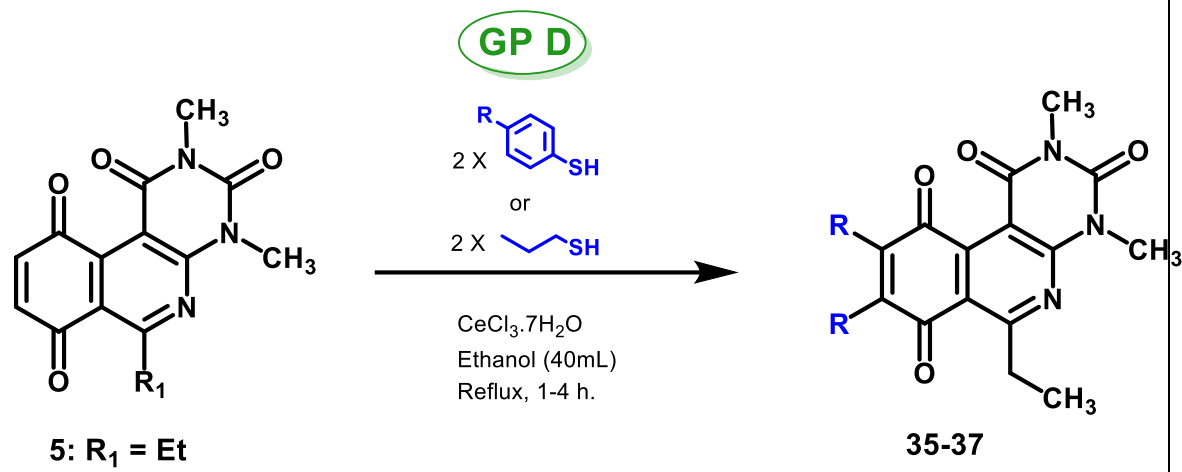

**TABLE S1. CRYSTALLOGRAPHIC INFORMATION**

|                                                              | <b>5c.cif</b>                                                       | <b>6c.cif</b>                                                     | <b>7c.cif</b>                                                     | <b>8c.cif</b>                                                     | <b>11c.cif</b>                                                    | <b>19c.cif</b>                                                    | <b>20c.cif</b>                                                    |
|--------------------------------------------------------------|---------------------------------------------------------------------|-------------------------------------------------------------------|-------------------------------------------------------------------|-------------------------------------------------------------------|-------------------------------------------------------------------|-------------------------------------------------------------------|-------------------------------------------------------------------|
| Figure                                                       | S5                                                                  | S6                                                                | S7                                                                | S8                                                                | S9                                                                | S10                                                               | S11                                                               |
| Empirical formula                                            | C <sub>21</sub> H <sub>15</sub> BrClN <sub>3</sub> O <sub>4</sub> S | C <sub>17</sub> H <sub>17</sub> N <sub>3</sub> O <sub>4</sub> S   | C <sub>21</sub> H <sub>17</sub> ClN <sub>4</sub> O <sub>4</sub>   | C <sub>21</sub> H <sub>17</sub> BrN <sub>4</sub> O <sub>4</sub>   | C <sub>20</sub> H <sub>14</sub> BrN <sub>3</sub> O <sub>4</sub> S | C <sub>19</sub> H <sub>21</sub> N <sub>3</sub> O <sub>4</sub> S   | C <sub>21</sub> H <sub>19</sub> N <sub>5</sub> O <sub>4</sub>     |
| Formula weight                                               | 520.78                                                              | 359.39                                                            | 424.84                                                            | 469.30                                                            | 472.31                                                            | 387.45                                                            | 405.41                                                            |
| Temperature [K]                                              | 298(2)                                                              | 298(2)                                                            | 298(2)                                                            | 298(2)                                                            | 298(2)                                                            | 298(2)                                                            | 298(2)                                                            |
| Crystal system                                               | monoclinic                                                          | triclinic                                                         | monoclinic                                                        | monoclinic                                                        | orthorhombic                                                      | monoclinic                                                        | monoclinic                                                        |
| Space group (number)                                         | <i>P</i> 2 <sub>1</sub> / <i>n</i> (14)                             | <i>P</i> $\bar{1}$ (2)                                            | <i>P</i> 2 <sub>1</sub> / <i>c</i> (14)                           | <i>P</i> 2 <sub>1</sub> / <i>c</i> (14)                           | <i>Pbcn</i> (60)                                                  | <i>P</i> 2 <sub>1</sub> / <i>n</i> (14)                           | <i>P</i> 2 <sub>1</sub> / <i>c</i> (14)                           |
| <i>a</i> [Å]                                                 | 9.0790(11)                                                          | 4.4062(8)                                                         | 7.6795(2)                                                         | 7.6848(2)                                                         | 24.2195(6)                                                        | 4.5196(2)                                                         | 8.7845(3)                                                         |
| <i>b</i> [Å]                                                 | 7.8903(17)                                                          | 10.9278(19)                                                       | 16.6845(4)                                                        | 16.8295(5)                                                        | 7.5475(2)                                                         | 26.8428(13)                                                       | 10.4767(4)                                                        |
| <i>c</i> [Å]                                                 | 28.412(3)                                                           | 17.524(3)                                                         | 15.1553(5)                                                        | 15.2751(5)                                                        | 21.3877(6)                                                        | 15.3585(10)                                                       | 21.3483(10)                                                       |
| $\alpha$ [°]                                                 | 90                                                                  | 80.857(5)                                                         | 90                                                                | 90                                                                | 90                                                                | 90                                                                | 90                                                                |
| $\beta$ [°]                                                  | 90.884(4)                                                           | 88.521(6)                                                         | 95.638(2)                                                         | 95.860(2)                                                         | 90                                                                | 95.006(4)                                                         | 99.351(3)                                                         |
| $\gamma$ [°]                                                 | 90                                                                  | 83.122(6)                                                         | 90                                                                | 90                                                                | 90                                                                | 90                                                                | 90                                                                |
| Volume [Å <sup>3</sup> ]                                     | 2035.1(5)                                                           | 827.1(3)                                                          | 1932.43(9)                                                        | 1965.23(10)                                                       | 3909.60(18)                                                       | 1856.17(17)                                                       | 1938.63(14)                                                       |
| <i>Z</i>                                                     | 4                                                                   | 2                                                                 | 4                                                                 | 4                                                                 | 8                                                                 | 4                                                                 | 4                                                                 |
| $\rho_{\text{calc}}$ [gcm <sup>-3</sup> ]                    | 1.700                                                               | 1.443                                                             | 1.460                                                             | 1.586                                                             | 1.605                                                             | 1.386                                                             | 1.389                                                             |
| $\mu$ [mm <sup>-1</sup> ]                                    | 2.290                                                               | 0.224                                                             | 2.080                                                             | 3.177                                                             | 4.156                                                             | 1.816                                                             | 0.821                                                             |
| <i>F</i> (000)                                               | 1048                                                                | 376                                                               | 880                                                               | 952                                                               | 1904                                                              | 816                                                               | 848                                                               |
| Reflections collected                                        | 16317                                                               | 11000                                                             | 22651                                                             | 38361                                                             | 19486                                                             | 18750                                                             | 36846                                                             |
| Independent reflections                                      | 4678                                                                | 2899                                                              | 3405                                                              | 3443                                                              | 3427                                                              | 3269                                                              | 3426                                                              |
| Completeness                                                 | 99.5 %                                                              | 99.1 %                                                            | 99.6 %                                                            | 99.4 %                                                            | 99.2 %                                                            | 98.5 %                                                            | 99.2 %                                                            |
| Data / Restraints / Parameters                               | 4678/0/283                                                          | 2899/0/230                                                        | 3405/0/275                                                        | 3443/0/275                                                        | 3427/0/266                                                        | 3269/0/249                                                        | 3426/0/276                                                        |
| Goodness-of-fit on <i>F</i> <sup>2</sup>                     | 1.034                                                               | 1.031                                                             | 1.062                                                             | 1.074                                                             | 1.090                                                             | 1.046                                                             | 1.043                                                             |
| Final <i>R</i> indexes [ <i>I</i> ≥ 2 $\sigma$ ( <i>I</i> )] | <i>R</i> <sub>1</sub> = 0.0323<br><i>wR</i> <sub>2</sub> = 0.0824   | <i>R</i> <sub>1</sub> = 0.0836<br><i>wR</i> <sub>2</sub> = 0.1503 | <i>R</i> <sub>1</sub> = 0.0684<br><i>wR</i> <sub>2</sub> = 0.1497 | <i>R</i> <sub>1</sub> = 0.0396<br><i>wR</i> <sub>2</sub> = 0.1001 | <i>R</i> <sub>1</sub> = 0.0654<br><i>wR</i> <sub>2</sub> = 0.1397 | <i>R</i> <sub>1</sub> = 0.0441<br><i>wR</i> <sub>2</sub> = 0.1083 | <i>R</i> <sub>1</sub> = 0.0481<br><i>wR</i> <sub>2</sub> = 0.1310 |
| Final <i>R</i> indexes [all data]                            | <i>R</i> <sub>1</sub> = 0.0466<br><i>wR</i> <sub>2</sub> = 0.0888   | <i>R</i> <sub>1</sub> = 0.2047<br><i>wR</i> <sub>2</sub> = 0.1864 | <i>R</i> <sub>1</sub> = 0.1194<br><i>wR</i> <sub>2</sub> = 0.1789 | <i>R</i> <sub>1</sub> = 0.0469<br><i>wR</i> <sub>2</sub> = 0.1059 | <i>R</i> <sub>1</sub> = 0.1055<br><i>wR</i> <sub>2</sub> = 0.1621 | <i>R</i> <sub>1</sub> = 0.0557<br><i>wR</i> <sub>2</sub> = 0.1155 | <i>R</i> <sub>1</sub> = 0.0508<br><i>wR</i> <sub>2</sub> = 0.1334 |
| Largest peak/hole [eÅ <sup>-3</sup> ]                        | 0.42/-0.59                                                          | 0.52/-0.21                                                        | 0.29/-0.27                                                        | 0.46/-0.65                                                        | 0.44/-0.64                                                        | 0.21/-0.20                                                        | 0.29/-0.23                                                        |



Figure S5

---

|                          |                                |           |             |
|--------------------------|--------------------------------|-----------|-------------|
| ●                        | <b>Alert level C</b>           |           |             |
| <u>PLAT431_ALERT_2_C</u> | Short Inter HL..A Contact Br12 | ..015     | 3.12 Ang.   |
|                          |                                | x,1+y,z = | 1_565 Check |

---

|                          |                                                |   |             |
|--------------------------|------------------------------------------------|---|-------------|
| ●                        | <b>Alert level G</b>                           |   |             |
| <u>PLAT883_ALERT_1_G</u> | No Info/Value for _atom_sites_solution_primary | . | Please Do ! |
| <u>PLAT941_ALERT_3_G</u> | Average HKL Measurement Multiplicity .....     |   | 3.5 Low     |

---

0 **ALERT level A** = Most likely a serious problem - resolve or explain  
0 **ALERT level B** = A potentially serious problem, consider carefully  
1 **ALERT level C** = Check. Ensure it is not caused by an omission or oversight  
2 **ALERT level G** = General information/check it is not something unexpected

1 ALERT type 1 CIF construction/syntax error, inconsistent or missing data  
1 ALERT type 2 Indicator that the structure model may be wrong or deficient  
1 ALERT type 3 Indicator that the structure quality may be low  
0 ALERT type 4 Improvement, methodology, query or suggestion  
0 ALERT type 5 Informative message, check

---

It is advisable to attempt to resolve as many as possible of the alerts in all categories. Often the minor alerts point to easily fixed oversights, errors and omissions in your CIF or refinement strategy, so attention to these fine details can be worthwhile. In order to resolve some of the more serious problems it may be necessary to carry out additional measurements or structure refinements. However, the purpose of your study may justify the reported deviations and the more serious of these should normally be commented upon in the discussion or experimental section of a paper or in the "special\_details" fields of the CIF. checkCIF was carefully designed to identify outliers and unusual parameters, but every test has its limitations and alerts that are not important in a particular case may appear. Conversely, the absence of alerts does not guarantee there are no aspects of the results needing attention. It is up to the individual to critically assess their own results and, if necessary, seek expert advice.

### Publication of your CIF in IUCr journals

A basic structural check has been run on your CIF. These basic checks will be run on all CIFs submitted for publication in IUCr journals (*Acta Crystallographica*, *Journal of Applied Crystallography*, *Journal of Synchrotron Radiation*); however, if you intend to submit to *Acta Crystallographica Section C* or *E* or *IUCrData*, you should make sure that full publication checks are run on the final version of your CIF prior to submission.

### Publication of your CIF in other journals

Please refer to the *Notes for Authors* of the relevant journal for any special instructions relating to CIF submission.

---

**PLATON version of 10/08/2020; check.def file version of 06/08/2020**

Figure S5

Datablock 5c - ellipsoid plot

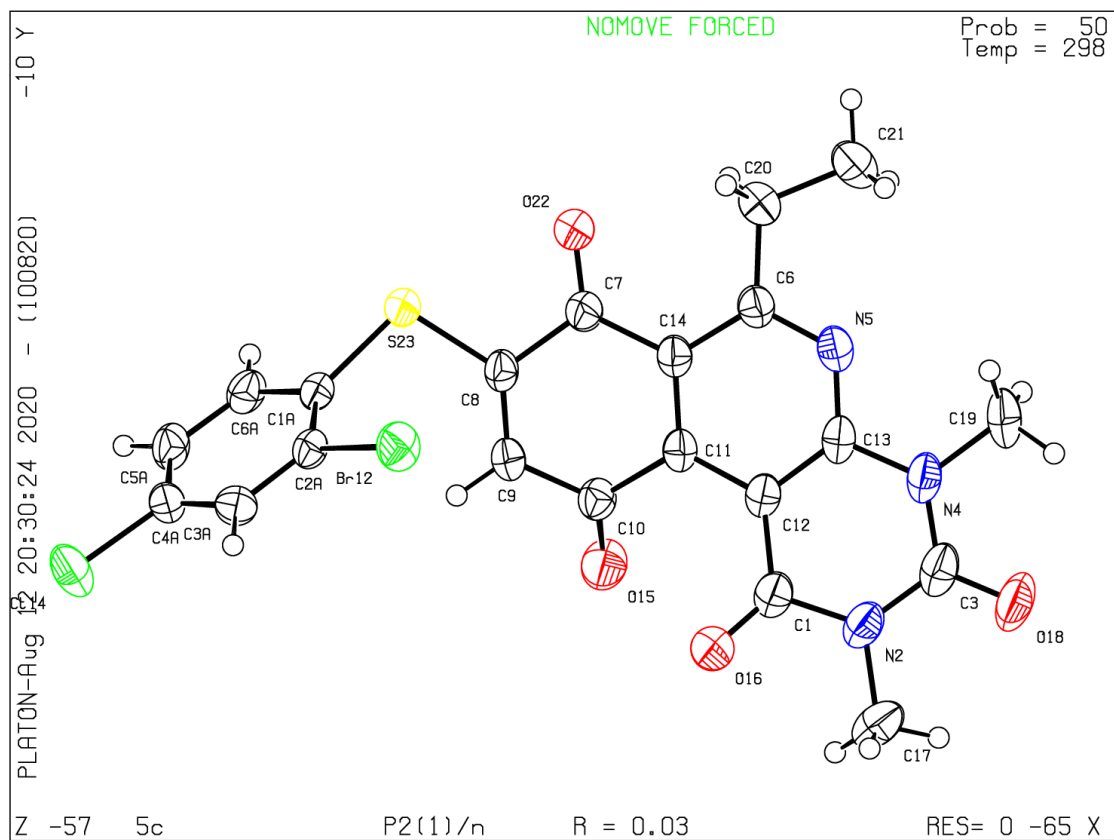





Figure S6

**Alert level B**


---

```

RINTA01_ALERT_3_B The value of Rint is greater than 0.18
                  Rint given 0.184
PLAT020_ALERT_3_B The Value of Rint is Greater Than 0.12 ..... 0.184 Report

```

---

**Alert level C**

```

PLAT026_ALERT_3_C Ratio Observed / Unique Reflections (too) Low .. 45% Check
PLAT094_ALERT_2_C Ratio of Maximum / Minimum Residual Density .... 2.54 Report
PLAT340_ALERT_3_C Low Bond Precision on C-C Bonds ..... 0.00731 Ang.

```

---

**Alert level G**

```

PLAT883_ALERT_1_G No Info/Value for _atom_sites_solution_primary . Please Do !
PLAT941_ALERT_3_G Average HKL Measurement Multiplicity ..... 3.8 Low

```

---

```

0 ALERT level A = Most likely a serious problem - resolve or explain
2 ALERT level B = A potentially serious problem, consider carefully
3 ALERT level C = Check. Ensure it is not caused by an omission or oversight
2 ALERT level G = General information/check it is not something unexpected

1 ALERT type 1 CIF construction/syntax error, inconsistent or missing data
1 ALERT type 2 Indicator that the structure model may be wrong or deficient
5 ALERT type 3 Indicator that the structure quality may be low
0 ALERT type 4 Improvement, methodology, query or suggestion
0 ALERT type 5 Informative message, check

```

---

**Validation response form**

Please find below a validation response form (VRF) that can be filled in and pasted into your CIF.

```

# start Validation Reply Form
_vrf_RINTA01_6c
;
PROBLEM: The value of Rint is greater than 0.18
RESPONSE: ...
;
_vrf_PLAT020_6c
;
PROBLEM: The Value of Rint is Greater Than 0.12 ..... 0.184 Report
RESPONSE: ...
;
# end Validation Reply Form

```

---

Figure S6

It is advisable to attempt to resolve as many as possible of the alerts in all categories. Often the minor alerts point to easily fixed oversights, errors and omissions in your CIF or refinement strategy, so attention to these fine details can be worthwhile. In order to resolve some of the more serious problems it may be necessary to carry out additional measurements or structure refinements. However, the purpose of your study may justify the reported deviations and the more serious of these should normally be commented upon in the discussion or experimental section of a paper or in the "special\_details" fields of the CIF. checkCIF was carefully designed to identify outliers and unusual parameters, but every test has its limitations and alerts that are not important in a particular case may appear. Conversely, the absence of alerts does not guarantee there are no aspects of the results needing attention. It is up to the individual to critically assess their own results and, if necessary, seek expert advice.

### **Publication of your CIF in IUCr journals**

A basic structural check has been run on your CIF. These basic checks will be run on all CIFs submitted for publication in IUCr journals (*Acta Crystallographica*, *Journal of Applied Crystallography*, *Journal of Synchrotron Radiation*); however, if you intend to submit to *Acta Crystallographica Section C* or *E* or *IUCrData*, you should make sure that full publication checks are run on the final version of your CIF prior to submission.

### **Publication of your CIF in other journals**

Please refer to the *Notes for Authors* of the relevant journal for any special instructions relating to CIF submission.

---

**PLATON version of 10/08/2020; check.def file version of 06/08/2020**

Figure S6

Datablock 6c - ellipsoid plot

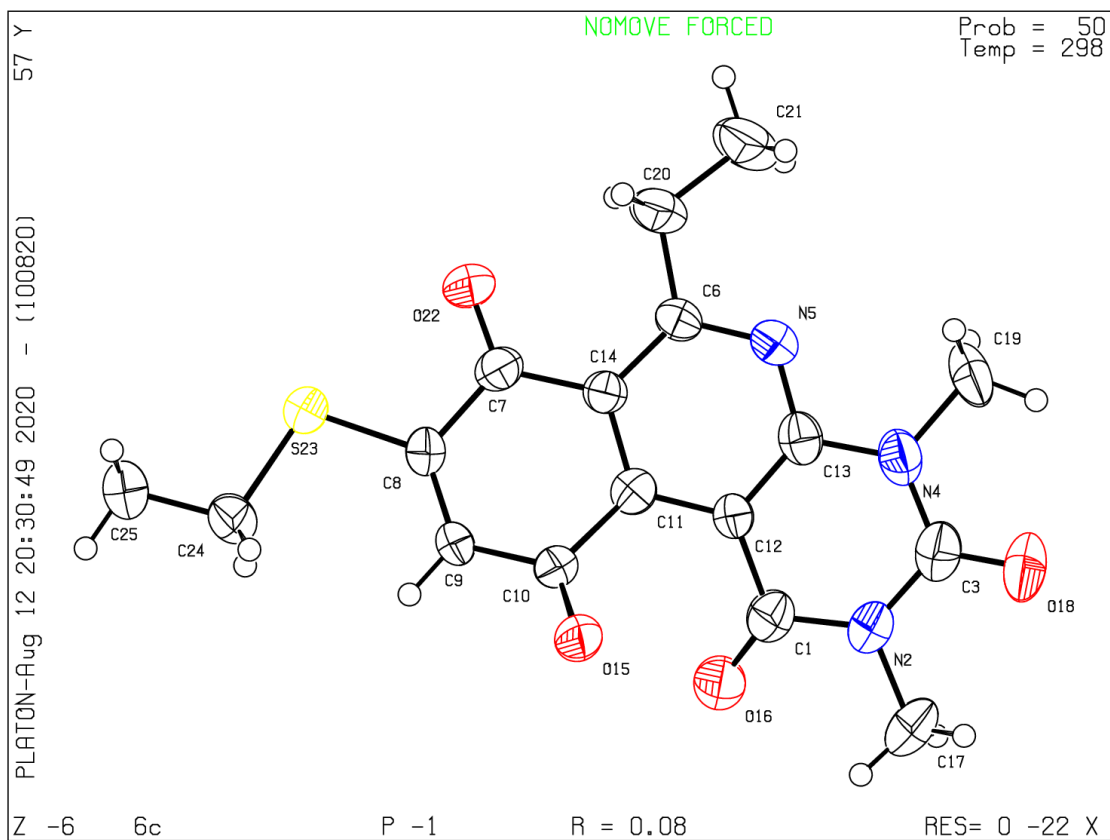

## Figure S7 **checkCIF/PLATON report**

You have not supplied any structure factors. As a result the full set of tests cannot be run.

THIS REPORT IS FOR GUIDANCE ONLY. IF USED AS PART OF A REVIEW PROCEDURE FOR PUBLICATION, IT SHOULD NOT REPLACE THE EXPERTISE OF AN EXPERIENCED CRYSTALLOGRAPHIC REFEREE.

No syntax errors found. [CIF dictionary](#) [Interpreting this report](#)

### **Datablock: 7c**

---

Bond precision: C-C = 0.0056 A                      Wavelength=1.54178

Cell:                      a=7.6795(2)              b=16.6845(4)              c=15.1553(5)  
                                    alpha=90              beta=95.638(2)              gamma=90

Temperature:              298 K

|                | Calculated       | Reported         |
|----------------|------------------|------------------|
| Volume         | 1932.43(9)       | 1932.43(9)       |
| Space group    | P 21/c           | P2(1)/c          |
| Hall group     | -P 2ybc          | -P 2ybc          |
| Moiety formula | C21 H17 Cl N4 O4 | C21 H17 Cl N4 O4 |
| Sum formula    | C21 H17 Cl N4 O4 | C21 H17 Cl N4 O4 |
| Mr             | 424.84           | 424.84           |
| Dx,g cm-3      | 1.460            | 1.460            |
| Z              | 4                | 4                |
| Mu (mm-1)      | 2.080            | 2.080            |
| F000           | 880.0            | 880.0            |
| F000'          | 884.11           |                  |
| h,k,lmax       | 9,19,18          | 9,19,17          |
| Nref           | 3418             | 3405             |
| Tmin,Tmax      | 0.779,0.812      | 0.622,0.753      |
| Tmin'          | 0.779            |                  |

Correction method= # Reported T Limits: Tmin=0.622 Tmax=0.753  
AbsCorr = MULTI-SCAN

Data completeness= 0.996                      Theta(max)= 66.758

R(reflections)= 0.0684( 2086)              wR2(reflections)= 0.1789( 3405)

S = 1.062                      Npar= 275

---

The following ALERTS were generated. Each ALERT has the format

**test-name\_ALERT\_alert-type\_alert-level.**

Click on the hyperlinks for more details of the test.

## Figure S7 ● Alert level C

---

|                          |                                       |              |
|--------------------------|---------------------------------------|--------------|
| <u>PLAT340 ALERT 3 C</u> | Low Bond Precision on C-C Bonds ..... | 0.00556 Ang. |
| <u>PLAT410 ALERT 2 C</u> | Short Intra H...H Contact H6A ..H9 .  | 1.99 Ang.    |
|                          | x,y,z =                               | 1_555 Check  |

---

## ● Alert level G

---

|                          |                                                  |             |
|--------------------------|--------------------------------------------------|-------------|
| <u>PLAT007 ALERT 5 G</u> | Number of Unrefined Donor-H Atoms .....          | 1 Report    |
| <u>PLAT432 ALERT 2 G</u> | Short Inter X...Y Contact O16 ..C19              | 2.89 Ang.   |
|                          | 2-x,-1/2+y,3/2-z =                               | 2_746 Check |
| <u>PLAT883 ALERT 1 G</u> | No Info/Value for _atom_sites_solution_primary . | Please Do ! |

---

---

0 **ALERT level A** = Most likely a serious problem - resolve or explain  
0 **ALERT level B** = A potentially serious problem, consider carefully  
2 **ALERT level C** = Check. Ensure it is not caused by an omission or oversight  
3 **ALERT level G** = General information/check it is not something unexpected

1 ALERT type 1 CIF construction/syntax error, inconsistent or missing data  
2 ALERT type 2 Indicator that the structure model may be wrong or deficient  
1 ALERT type 3 Indicator that the structure quality may be low  
0 ALERT type 4 Improvement, methodology, query or suggestion  
1 ALERT type 5 Informative message, check

---

It is advisable to attempt to resolve as many as possible of the alerts in all categories. Often the minor alerts point to easily fixed oversights, errors and omissions in your CIF or refinement strategy, so attention to these fine details can be worthwhile. In order to resolve some of the more serious problems it may be necessary to carry out additional measurements or structure refinements. However, the purpose of your study may justify the reported deviations and the more serious of these should normally be commented upon in the discussion or experimental section of a paper or in the "special\_details" fields of the CIF. checkCIF was carefully designed to identify outliers and unusual parameters, but every test has its limitations and alerts that are not important in a particular case may appear. Conversely, the absence of alerts does not guarantee there are no aspects of the results needing attention. It is up to the individual to critically assess their own results and, if necessary, seek expert advice.

### Publication of your CIF in IUCr journals

A basic structural check has been run on your CIF. These basic checks will be run on all CIFs submitted for publication in IUCr journals (*Acta Crystallographica*, *Journal of Applied Crystallography*, *Journal of Synchrotron Radiation*); however, if you intend to submit to *Acta Crystallographica Section C* or *E* or *IUCrData*, you should make sure that full publication checks are run on the final version of your CIF prior to submission.

### Publication of your CIF in other journals

Please refer to the *Notes for Authors* of the relevant journal for any special instructions relating to CIF submission.

---

**PLATON version of 10/08/2020; check.def file version of 06/08/2020**



## Figure S8 **checkCIF/PLATON report**

You have not supplied any structure factors. As a result the full set of tests cannot be run.

THIS REPORT IS FOR GUIDANCE ONLY. IF USED AS PART OF A REVIEW PROCEDURE FOR PUBLICATION, IT SHOULD NOT REPLACE THE EXPERTISE OF AN EXPERIENCED CRYSTALLOGRAPHIC REFEREE.

No syntax errors found.

[CIF dictionary](#)

[Interpreting this report](#)

### **Datablock: 8c**

---

Bond precision: C-C = 0.0033 A                      Wavelength=1.54178

Cell:                      a=7.6848(2)              b=16.8295(5)              c=15.2751(5)  
                                    alpha=90              beta=95.860(2)              gamma=90

Temperature:              298 K

|                | Calculated       | Reported         |
|----------------|------------------|------------------|
| Volume         | 1965.23(10)      | 1965.23(10)      |
| Space group    | P 21/c           | P2(1)/c          |
| Hall group     | -P 2ybc          | -P 2ybc          |
| Moiety formula | C21 H17 Br N4 O4 | C21 H17 Br N4 O4 |
| Sum formula    | C21 H17 Br N4 O4 | C21 H17 Br N4 O4 |
| Mr             | 469.29           | 469.30           |
| Dx,g cm-3      | 1.586            | 1.586            |
| Z              | 4                | 4                |
| Mu (mm-1)      | 3.177            | 3.177            |
| F000           | 952.0            | 952.0            |
| F000'          | 951.93           |                  |
| h,k,lmax       | 9,20,18          | 9,19,18          |
| Nref           | 3464             | 3443             |
| Tmin,Tmax      | 0.717,0.728      | 0.537,0.753      |
| Tmin'          | 0.650            |                  |

Correction method= # Reported T Limits: Tmin=0.537 Tmax=0.753  
AbsCorr = MULTI-SCAN

Data completeness= 0.994

Theta(max)= 66.641

R(reflections)= 0.0396( 2971)

wR2(reflections)= 0.1059( 3443)

S = 1.074

Npar= 275

---

The following ALERTS were generated. Each ALERT has the format

**test-name\_ALERT\_alert-type\_alert-level.**

Click on the hyperlinks for more details of the test.

Figure S8

| Alert level G     |                                                  |             |
|-------------------|--------------------------------------------------|-------------|
| PLAT007 ALERT 5 G | Number of Unrefined Donor-H Atoms .....          | 1 Report    |
| PLAT432 ALERT 2 G | Short Inter X...Y Contact O16 ..C19              | 2.96 Ang.   |
|                   | 2-x,-1/2+y,3/2-z =                               | 2_746 Check |
| PLAT434 ALERT 2 G | Short Inter HL..HL Contact Br14 ..Br14           | 3.55 Ang.   |
|                   | -x,-y,1-z =                                      | 3_556 Check |
| PLAT883 ALERT 1 G | No Info/Value for _atom_sites_solution_primary . | Please Do ! |

- 
- 0 **ALERT level A** = Most likely a serious problem - resolve or explain  
 0 **ALERT level B** = A potentially serious problem, consider carefully  
 0 **ALERT level C** = Check. Ensure it is not caused by an omission or oversight  
 4 **ALERT level G** = General information/check it is not something unexpected
- 1 ALERT type 1 CIF construction/syntax error, inconsistent or missing data  
 2 ALERT type 2 Indicator that the structure model may be wrong or deficient  
 0 ALERT type 3 Indicator that the structure quality may be low  
 0 ALERT type 4 Improvement, methodology, query or suggestion  
 1 ALERT type 5 Informative message, check
- 

It is advisable to attempt to resolve as many as possible of the alerts in all categories. Often the minor alerts point to easily fixed oversights, errors and omissions in your CIF or refinement strategy, so attention to these fine details can be worthwhile. In order to resolve some of the more serious problems it may be necessary to carry out additional measurements or structure refinements. However, the purpose of your study may justify the reported deviations and the more serious of these should normally be commented upon in the discussion or experimental section of a paper or in the "special\_details" fields of the CIF. checkCIF was carefully designed to identify outliers and unusual parameters, but every test has its limitations and alerts that are not important in a particular case may appear. Conversely, the absence of alerts does not guarantee there are no aspects of the results needing attention. It is up to the individual to critically assess their own results and, if necessary, seek expert advice.

### Publication of your CIF in IUCr journals

A basic structural check has been run on your CIF. These basic checks will be run on all CIFs submitted for publication in IUCr journals (*Acta Crystallographica*, *Journal of Applied Crystallography*, *Journal of Synchrotron Radiation*); however, if you intend to submit to *Acta Crystallographica Section C* or *E* or *IUCrData*, you should make sure that **full publication checks** are run on the final version of your CIF prior to submission.

### Publication of your CIF in other journals

Please refer to the *Notes for Authors* of the relevant journal for any special instructions relating to CIF submission.

---

**PLATON version of 10/08/2020; check.def file version of 06/08/2020**



Figure S8

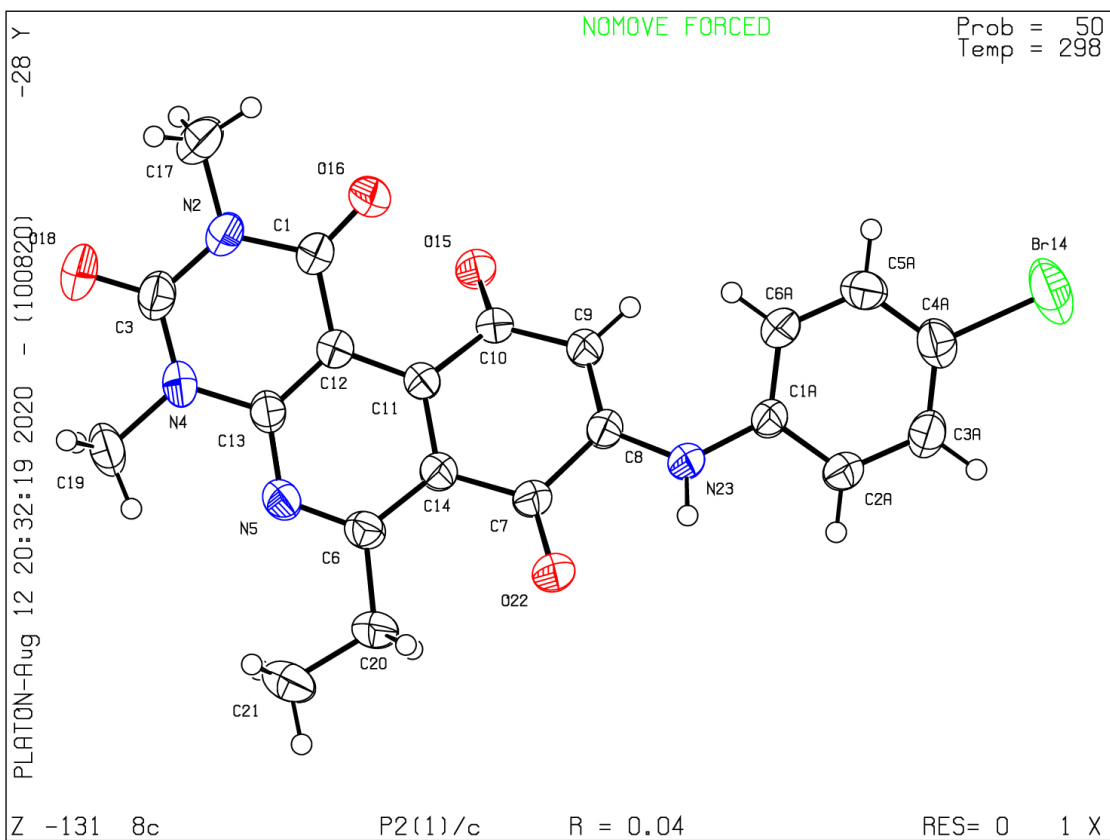

## Figure S9 **checkCIF/PLATON report**

You have not supplied any structure factors. As a result the full set of tests cannot be run.

THIS REPORT IS FOR GUIDANCE ONLY. IF USED AS PART OF A REVIEW PROCEDURE FOR PUBLICATION, IT SHOULD NOT REPLACE THE EXPERTISE OF AN EXPERIENCED CRYSTALLOGRAPHIC REFEREE.

No syntax errors found. [CIF dictionary](#) [Interpreting this report](#)

### **Datablock: 11c**

---

Bond precision: C-C = 0.0081 A Wavelength=1.54178

Cell: a=24.2195(6) b=7.5475(2) c=21.3877(6)  
alpha=90 beta=90 gamma=90  
Temperature: 298 K

|                | Calculated         | Reported           |
|----------------|--------------------|--------------------|
| Volume         | 3909.60(18)        | 3909.60(18)        |
| Space group    | P b c n            | P b c n            |
| Hall group     | -P 2n 2ab          | -P 2n 2ab          |
| Moiety formula | C20 H14 Br N3 O4 S | C20 H14 Br N3 O4 S |
| Sum formula    | C20 H14 Br N3 O4 S | C20 H14 Br N3 O4 S |
| Mr             | 472.30             | 472.31             |
| Dx,g cm-3      | 1.605              | 1.605              |
| Z              | 8                  | 8                  |
| Mu (mm-1)      | 4.156              | 4.156              |
| F000           | 1904.0             | 1904.0             |
| F000'          | 1906.21            |                    |
| h,k,lmax       | 28,8,25            | 28,8,25            |
| Nref           | 3455               | 3427               |
| Tmin,Tmax      | 0.638,0.660        | 0.442,0.753        |
| Tmin'          | 0.578              |                    |

Correction method= # Reported T Limits: Tmin=0.442 Tmax=0.753  
AbsCorr = NONE

Data completeness= 0.992 Theta(max)= 66.747

R(reflections)= 0.0654( 2228) wR2(reflections)= 0.1621( 3427)

S = 1.090 Npar= 266

---

The following ALERTS were generated. Each ALERT has the format

**test-name\_ALERT\_alert-type\_alert-level.**

Click on the hyperlinks for more details of the test.

Figure S9

---

|                          |                                                  |              |
|--------------------------|--------------------------------------------------|--------------|
| <b>● Alert level C</b>   |                                                  |              |
| <u>PLAT341 ALERT 3 C</u> | Low Bond Precision on C-C Bonds .....            | 0.00812 Ang. |
| <u>PLAT601 ALERT 2 C</u> | Unit Cell Contains Solvent Accessible VOIDS of . | 38 Ang**3    |

---

|                          |                                                  |             |
|--------------------------|--------------------------------------------------|-------------|
| <b>● Alert level G</b>   |                                                  |             |
| <u>PLAT083 ALERT 2 G</u> | SHELXL Second Parameter in WGHT Unusually Large  | 10.26 Why ? |
| <u>PLAT432 ALERT 2 G</u> | Short Inter X...Y Contact O16 ..C3               | 3.01 Ang.   |
|                          | 3/2-x,1/2+y,z =                                  | 8_765 Check |
| <u>PLAT883 ALERT 1 G</u> | No Info/Value for _atom_sites_solution_primary . | Please Do ! |

---

0 **ALERT level A** = Most likely a serious problem - resolve or explain  
0 **ALERT level B** = A potentially serious problem, consider carefully  
2 **ALERT level C** = Check. Ensure it is not caused by an omission or oversight  
3 **ALERT level G** = General information/check it is not something unexpected

1 ALERT type 1 CIF construction/syntax error, inconsistent or missing data  
3 ALERT type 2 Indicator that the structure model may be wrong or deficient  
1 ALERT type 3 Indicator that the structure quality may be low  
0 ALERT type 4 Improvement, methodology, query or suggestion  
0 ALERT type 5 Informative message, check

---

It is advisable to attempt to resolve as many as possible of the alerts in all categories. Often the minor alerts point to easily fixed oversights, errors and omissions in your CIF or refinement strategy, so attention to these fine details can be worthwhile. In order to resolve some of the more serious problems it may be necessary to carry out additional measurements or structure refinements. However, the purpose of your study may justify the reported deviations and the more serious of these should normally be commented upon in the discussion or experimental section of a paper or in the "special\_details" fields of the CIF. checkCIF was carefully designed to identify outliers and unusual parameters, but every test has its limitations and alerts that are not important in a particular case may appear. Conversely, the absence of alerts does not guarantee there are no aspects of the results needing attention. It is up to the individual to critically assess their own results and, if necessary, seek expert advice.

### Publication of your CIF in IUCr journals

A basic structural check has been run on your CIF. These basic checks will be run on all CIFs submitted for publication in IUCr journals (*Acta Crystallographica*, *Journal of Applied Crystallography*, *Journal of Synchrotron Radiation*); however, if you intend to submit to *Acta Crystallographica Section C* or *E* or *IUCrData*, you should make sure that full publication checks are run on the final version of your CIF prior to submission.

### Publication of your CIF in other journals

Please refer to the *Notes for Authors* of the relevant journal for any special instructions relating to CIF submission.

---

**PLATON version of 10/08/2020; check.def file version of 06/08/2020**

Figure S9

Datablock 11c - ellipsoid plot

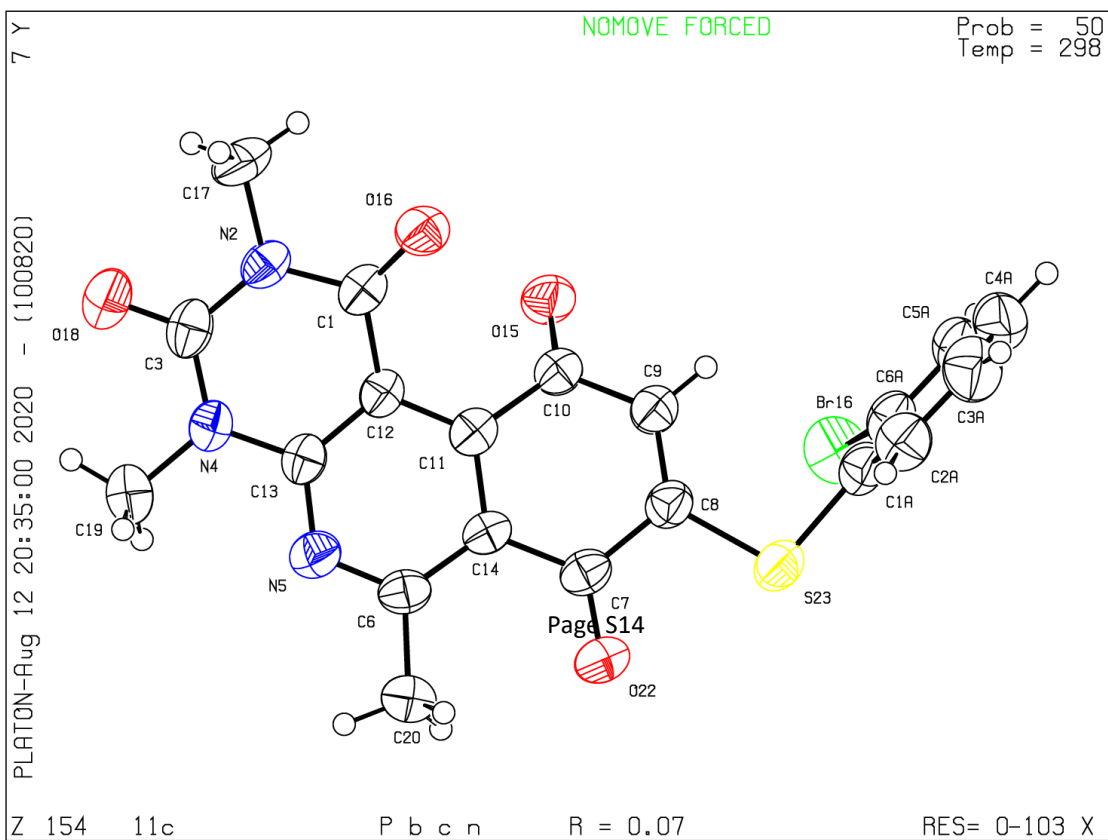



---

**Alert level G**

PLAT335 ALERT 2 G Check Large C6 Ring C-C Range C7 -C14 0.17 Ang.  
 PLAT883 ALERT 1 G No Info/Value for \_atom\_sites\_solution\_primary . Please Do !

---

0 **ALERT level A** = Most likely a serious problem - resolve or explain  
 0 **ALERT level B** = A potentially serious problem, consider carefully  
 0 **ALERT level C** = Check. Ensure it is not caused by an omission or oversight  
 2 **ALERT level G** = General information/check it is not something unexpected

1 ALERT type 1 CIF construction/syntax error, inconsistent or missing data  
 1 ALERT type 2 Indicator that the structure model may be wrong or deficient  
 0 ALERT type 3 Indicator that the structure quality may be low  
 0 ALERT type 4 Improvement, methodology, query or suggestion  
 0 ALERT type 5 Informative message, check

---

It is advisable to attempt to resolve as many as possible of the alerts in all categories. Often the minor alerts point to easily fixed oversights, errors and omissions in your CIF or refinement strategy, so attention to these fine details can be worthwhile. In order to resolve some of the more serious problems it may be necessary to carry out additional measurements or structure refinements. However, the purpose of your study may justify the reported deviations and the more serious of these should normally be commented upon in the discussion or experimental section of a paper or in the "special\_details" fields of the CIF. checkCIF was carefully designed to identify outliers and unusual parameters, but every test has its limitations and alerts that are not important in a particular case may appear. Conversely, the absence of alerts does not guarantee there are no aspects of the results needing attention. It is up to the individual to critically assess their own results and, if necessary, seek expert advice.

### Publication of your CIF in IUCr journals

A basic structural check has been run on your CIF. These basic checks will be run on all CIFs submitted for publication in IUCr journals (*Acta Crystallographica*, *Journal of Applied Crystallography*, *Journal of Synchrotron Radiation*); however, if you intend to submit to *Acta Crystallographica Section C* or *E* or *IUCrData*, you should make sure that **full publication checks** are run on the final version of your CIF prior to submission.

### Publication of your CIF in other journals

Please refer to the *Notes for Authors* of the relevant journal for any special instructions relating to CIF submission.

---

**PLATON version of 10/08/2020; check.def file version of 06/08/2020**

Figure S10 Datablock 19c - ellipsoid plot

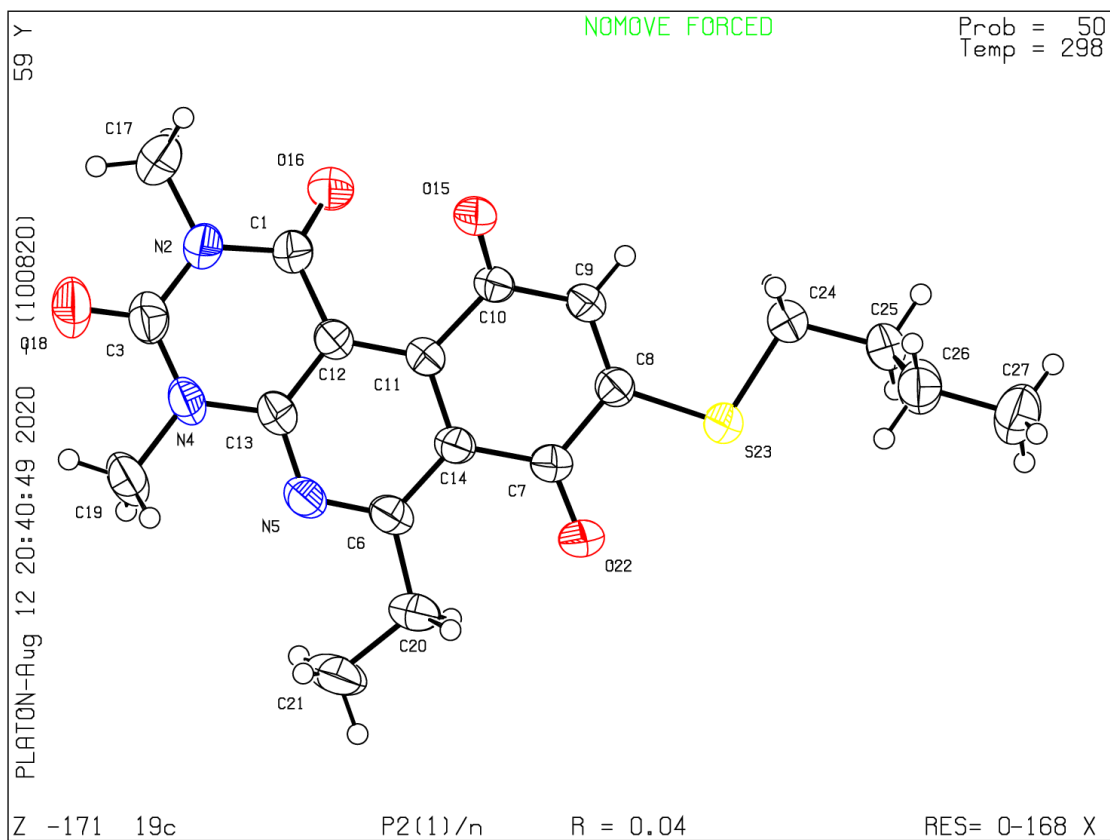

## Figure S11 **checkCIF/PLATON report**

You have not supplied any structure factors. As a result the full set of tests cannot be run.

THIS REPORT IS FOR GUIDANCE ONLY. IF USED AS PART OF A REVIEW PROCEDURE FOR PUBLICATION, IT SHOULD NOT REPLACE THE EXPERTISE OF AN EXPERIENCED CRYSTALLOGRAPHIC REFEREE.

No syntax errors found.

[CIF dictionary](#)

[Interpreting this report](#)

### **Datablock: 20c**

---

Bond precision: C-C = 0.0021 A                      Wavelength=1.54178

Cell:                      a=8.7845(3)              b=10.4767(4)              c=21.3483(10)  
                                    alpha=90              beta=99.351(3)              gamma=90

Temperature:              298 K

|                | Calculated    | Reported      |
|----------------|---------------|---------------|
| Volume         | 1938.63(14)   | 1938.63(14)   |
| Space group    | P 21/c        | P2(1)/c       |
| Hall group     | -P 2ybc       | -P 2ybc       |
| Moiety formula | C21 H19 N5 O4 | C21 H19 N5 O4 |
| Sum formula    | C21 H19 N5 O4 | C21 H19 N5 O4 |
| Mr             | 405.41        | 405.41        |
| Dx,g cm-3      | 1.389         | 1.389         |
| Z              | 4             | 4             |
| Mu (mm-1)      | 0.821         | 0.821         |
| F000           | 848.0         | 848.0         |
| F000'          | 850.74        |               |
| h,k,lmax       | 10,12,25      | 10,12,25      |
| Nref           | 3453          | 3426          |
| Tmin,Tmax      | 0.906,0.914   | 0.488,0.753   |
| Tmin'          | 0.906         |               |

Correction method= # Reported T Limits: Tmin=0.488 Tmax=0.753  
AbsCorr = MULTI-SCAN

Data completeness= 0.992

Theta(max)= 66.788

R(reflections)= 0.0481( 3178)

wR2(reflections)= 0.1334( 3426)

S = 1.043

Npar= 276

---

The following ALERTS were generated. Each ALERT has the format

**test-name\_ALERT\_alert-type\_alert-level.**

Click on the hyperlinks for more details of the test.



Figure S11

**Alert level C**

|                   |                                               |           |
|-------------------|-----------------------------------------------|-----------|
| PLAT220 ALERT 2 C | NonSolvent Resd 1 C Ueq(max)/Ueq(min) Range   | 3.1 Ratio |
| PLAT242 ALERT 2 C | Low 'MainMol' Ueq as Compared to Neighbors of | C20 Check |

**Alert level G**

|                   |                                                  |             |
|-------------------|--------------------------------------------------|-------------|
| PLAT007 ALERT 5 G | Number of Unrefined Donor-H Atoms .....          | 3 Report    |
| PLAT432 ALERT 2 G | Short Inter X...Y Contact O15 ..C7               | 2.92 Ang.   |
|                   | 1-x,1-y,1-z =                                    | 3_666 Check |
| PLAT432 ALERT 2 G | Short Inter X...Y Contact O22 ..C3               | 2.98 Ang.   |
|                   | -x,1-y,1-z =                                     | 3_566 Check |
| PLAT883 ALERT 1 G | No Info/Value for _atom_sites_solution_primary . | Please Do ! |
| PLAT933 ALERT 2 G | Number of OMIT Records in Embedded .res File ... | 1 Note      |

- 0 **ALERT level A** = Most likely a serious problem - resolve or explain  
 0 **ALERT level B** = A potentially serious problem, consider carefully  
 2 **ALERT level C** = Check. Ensure it is not caused by an omission or oversight  
 5 **ALERT level G** = General information/check it is not something unexpected
- 1 ALERT type 1 CIF construction/syntax error, inconsistent or missing data  
 5 ALERT type 2 Indicator that the structure model may be wrong or deficient  
 0 ALERT type 3 Indicator that the structure quality may be low  
 0 ALERT type 4 Improvement, methodology, query or suggestion  
 1 ALERT type 5 Informative message, check

It is advisable to attempt to resolve as many as possible of the alerts in all categories. Often the minor alerts point to easily fixed oversights, errors and omissions in your CIF or refinement strategy, so attention to these fine details can be worthwhile. In order to resolve some of the more serious problems it may be necessary to carry out additional measurements or structure refinements. However, the purpose of your study may justify the reported deviations and the more serious of these should normally be commented upon in the discussion or experimental section of a paper or in the "special\_details" fields of the CIF. checkCIF was carefully designed to identify outliers and unusual parameters, but every test has its limitations and alerts that are not important in a particular case may appear. Conversely, the absence of alerts does not guarantee there are no aspects of the results needing attention. It is up to the individual to critically assess their own results and, if necessary, seek expert advice.

**Publication of your CIF in IUCr journals**

A basic structural check has been run on your CIF. These basic checks will be run on all CIFs submitted for publication in IUCr journals (*Acta Crystallographica*, *Journal of Applied Crystallography*, *Journal of Synchrotron Radiation*); however, if you intend to submit to *Acta Crystallographica Section C* or *E* or *IUCrData*, you should make sure that full publication checks are run on the final version of your CIF prior to submission.

**Publication of your CIF in other journals**

Please refer to the *Notes for Authors* of the relevant journal for any special instructions relating to CIF submission.

Figure S11

PLATON version of 10/08/2020; check.def file version of 06/08/2020

Datablock 20c - ellipsoid plot

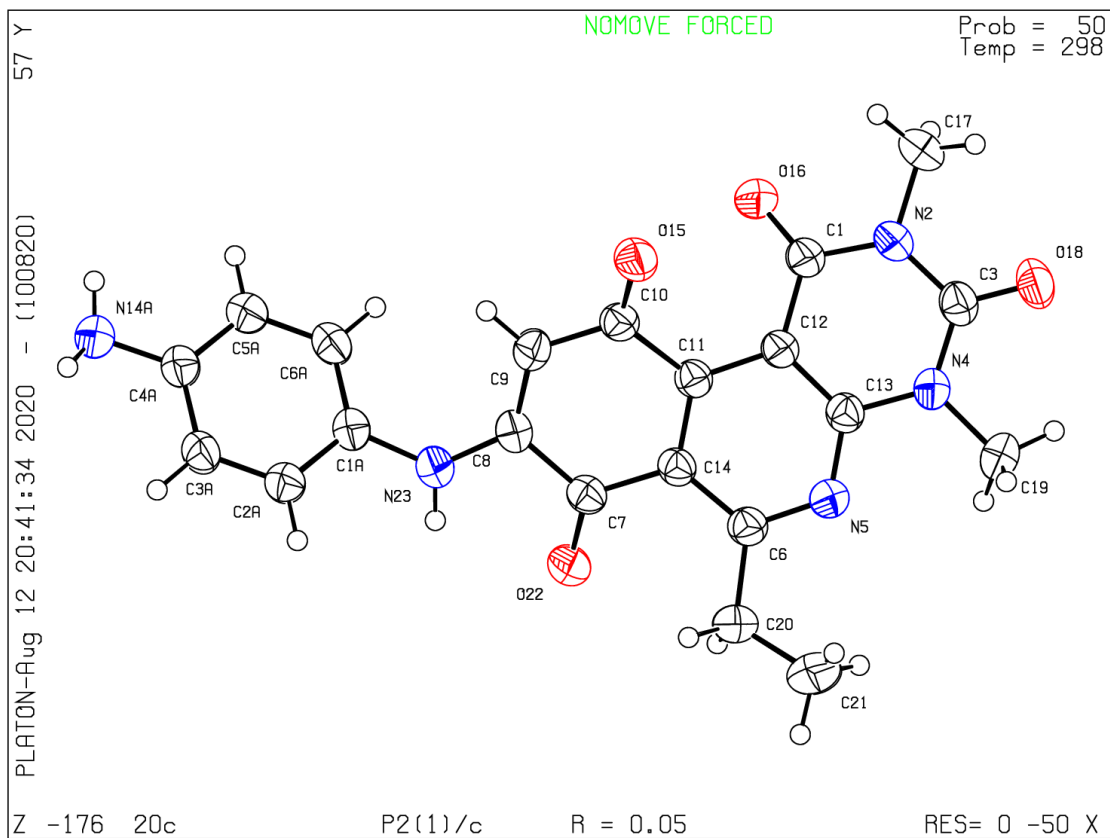

Supplement: s1 [file s1]
